# Supplementary material
Source: PubMed Central journal article supplement (PMC10227859)
Supplement: NIHMS1896884-supplement-Supplementary_file.pdf [file NIHMS1896884-supplement-Supplementary_file.pdf]

## Supplemental Information

**SUPPLEMENTAL TABLE 2** Observed and Expected Rates During the COVID-19 Period in the United States from March 1, 2020 to December 31, 2020 by Firearms

| Firearms                            | Observed <sup>a</sup> | Expected <sup>a</sup> | Rate Ratio | 95% CI    |
|-------------------------------------|-----------------------|-----------------------|------------|-----------|
| Sex                                 |                       |                       |            |           |
| Female                              | 327                   | 271                   | 1.21       | 1.08–1.34 |
| Male                                | 2516                  | 2216                  | 1.14       | 1.09–1.18 |
| Age                                 |                       |                       |            |           |
| 5–12                                | 51                    | 24                    | 2.13       | 1.61–2.80 |
| 13–17                               | 536                   | 539                   | 0.99       | 0.91–1.08 |
| 18–24                               | 2256                  | 1922                  | 1.17       | 1.13–1.22 |
| Race and ethnicity                  |                       |                       |            |           |
| American Indian <sup>b</sup>        | 72                    | 35                    | 2.06       | 1.63–2.59 |
| Asian/Pacific Islander <sup>b</sup> | 83                    | 69                    | 1.20       | 0.97–1.49 |
| Black <sup>b</sup>                  | 450                   | 301                   | 1.50       | 1.36–1.64 |
| White <sup>b</sup>                  | 1806                  | 1708                  | 1.06       | 1.01–1.11 |
| Hispanic                            | 431                   | 363                   | 1.19       | 1.08–1.30 |

<sup>a</sup> Observed and expected rates are reported for the COVID-19 period; however, expected rates were modeled from the trend in monthly suicide deaths before COVID-19 (January 1, 2015–February 29, 2020).

<sup>b</sup> Non-Hispanic.

**SUPPLEMENTAL TABLE 3** Observed and Expected Monthly Rates During the COVID-19 Period in the United States from March 1, 2020 to December 31, 2020 Overall and by Sex and Age Group

|           | Observed | Expected | Rate Ratio | 95% CI    |
|-----------|----------|----------|------------|-----------|
| Overall   |          |          |            |           |
| March     | 545      | 555      | 0.98       | 0.90–1.07 |
| April     | 517      | 556      | 0.93       | 0.85–1.01 |
| May       | 495      | 539      | 0.92       | 0.84–1.00 |
| June      | 519      | 520      | 1.00       | 0.92–1.09 |
| July      | 571      | 517      | 1.10       | 1.02–1.20 |
| August    | 581      | 531      | 1.09       | 1.01–1.19 |
| September | 633      | 548      | 1.15       | 1.07–1.25 |
| October   | 636      | 549      | 1.16       | 1.07–1.25 |
| November  | 561      | 531      | 1.06       | 0.97–1.15 |
| December  | 510      | 509      | 1.00       | 0.92–1.09 |
| Sex       |          |          |            |           |
| Female    |          |          |            |           |
| March     | 122      | 121      | 1.01       | 0.85–1.21 |
| April     | 122      | 124      | 0.98       | 0.82–1.18 |
| May       | 91       | 121      | 0.75       | 0.61–0.92 |
| June      | 114      | 115      | 0.99       | 0.83–1.19 |
| July      | 92       | 110      | 0.84       | 0.68–1.03 |
| August    | 117      | 110      | 1.06       | 0.89–1.27 |
| September | 126      | 115      | 1.10       | 0.92–1.31 |
| October   | 152      | 118      | 1.28       | 1.09–1.50 |
| November  | 134      | 118      | 1.14       | 0.96–1.34 |
| December  | 90       | 114      | 0.79       | 0.64–0.97 |
| Male      |          |          |            |           |
| March     | 423      | 434      | 0.97       | 0.89–1.07 |
| April     | 395      | 433      | 0.91       | 0.83–1.01 |
| May       | 404      | 418      | 0.97       | 0.88–1.06 |
| June      | 405      | 406      | 1.00       | 0.91–1.10 |
| July      | 479      | 407      | 1.18       | 1.08–1.29 |
| August    | 464      | 421      | 1.10       | 1.01–1.21 |
| September | 507      | 434      | 1.17       | 1.07–1.28 |
| October   | 484      | 431      | 1.12       | 1.03–1.23 |
| November  | 427      | 413      | 1.03       | 0.94–1.14 |
| December  | 420      | 395      | 1.06       | 0.97–1.17 |
| Age       |          |          |            |           |
| 13–17     |          |          |            |           |
| March     | 108      | 141      | 0.76       | 0.63–0.92 |
| April     | 106      | 135      | 0.79       | 0.65–0.95 |
| May       | 93       | 118      | 0.79       | 0.65–0.97 |
| June      | 101      | 103      | 0.98       | 0.81–1.19 |
| July      | 95       | 101      | 0.95       | 0.77–1.16 |
| August    | 127      | 111      | 1.15       | 0.97–1.37 |
| September | 150      | 126      | 1.19       | 1.02–1.40 |
| October   | 163      | 133      | 1.23       | 1.05–1.43 |
| November  | 144      | 127      | 1.13       | 0.96–1.33 |
| December  | 125      | 119      | 1.05       | 0.88–1.26 |
| 18–24     |          |          |            |           |
| March     | 422      | 399      | 1.06       | 0.96–1.16 |
| April     | 396      | 407      | 0.97       | 0.88–1.07 |
| May       | 390      | 408      | 0.96       | 0.87–1.06 |
| June      | 401      | 406      | 0.99       | 0.90–1.09 |
| July      | 463      | 406      | 1.14       | 1.04–1.25 |
| August    | 441      | 408      | 1.08       | 0.98–1.19 |
| September | 465      | 409      | 1.14       | 1.04–1.25 |
| October   | 453      | 402      | 1.13       | 1.03–1.24 |
| November  | 399      | 389      | 1.03       | 0.93–1.13 |
| December  | 373      | 377      | 0.99       | 0.89–1.10 |

Observed and expected rates are reported for the COVID-19 period, however expected rates were modeled from the trend in monthly suicide deaths before COVID-19 (January 1, 2015–February 29, 2020).

**SUPPLEMENTAL TABLE 4** Observed and Expected Monthly Rates During the COVID-19 Period in the United States From March 1, 2020 to December 31, 2020 by Race and Ethnicity<sup>a,b</sup>

|                                                     | Observed | Expected | Rate Ratio | 95% CI    |
|-----------------------------------------------------|----------|----------|------------|-----------|
| <b>American Indian or Alaska Native<sup>b</sup></b> |          |          |            |           |
| March                                               | 20       | 14       | 1.41       | 0.91–2.19 |
| April                                               | 16       | 15       | 1.06       | 0.65–1.73 |
| May                                                 | 14       | 15       | 0.93       | 0.55–1.57 |
| June                                                | 13       | 14       | 0.91       | 0.53–1.57 |
| July                                                | 22       | 14       | 1.62       | 1.06–2.45 |
| August                                              | 12       | 14       | 0.87       | 0.49–1.53 |
| September                                           | 18       | 14       | 1.25       | 0.78–1.98 |
| October                                             | 23       | 15       | 1.56       | 1.04–2.35 |
| November                                            | 20       | 14       | 1.43       | 0.92–2.22 |
| December                                            | 12       | 13       | 0.94       | 0.53–1.65 |
| <b>Asian or Pacific Islander<sup>b</sup></b>        |          |          |            |           |
| March                                               | 34       | 27       | 1.27       | 0.91–1.78 |
| April                                               | 23       | 27       | 0.85       | 0.57–1.28 |
| May                                                 | 21       | 26       | 0.79       | 0.52–1.22 |
| June                                                | 19       | 26       | 0.74       | 0.47–1.16 |
| July                                                | 21       | 25       | 0.83       | 0.54–1.27 |
| August                                              | 28       | 26       | 1.10       | 0.76–1.59 |
| September                                           | 39       | 26       | 1.50       | 1.10–2.06 |
| October                                             | 31       | 26       | 1.21       | 0.85–1.71 |
| November                                            | 29       | 25       | 1.17       | 0.81–1.68 |
| December                                            | 17       | 24       | 0.72       | 0.44–1.15 |
| <b>Black<sup>b</sup></b>                            |          |          |            |           |
| March                                               | 75       | 65       | 1.15       | 0.92–1.45 |
| April                                               | 54       | 67       | 0.80       | 0.61–1.05 |
| May                                                 | 79       | 69       | 1.15       | 0.92–1.43 |
| June                                                | 87       | 68       | 1.27       | 1.03–1.57 |
| July                                                | 86       | 66       | 1.30       | 1.05–1.61 |
| August                                              | 82       | 64       | 1.28       | 1.03–1.58 |
| September                                           | 91       | 65       | 1.41       | 1.15–1.73 |
| October                                             | 99       | 66       | 1.49       | 1.23–1.82 |
| November                                            | 67       | 68       | 0.99       | 0.78–1.26 |
| December                                            | 81       | 67       | 1.21       | 0.98–1.51 |
| <b>White<sup>b</sup></b>                            |          |          |            |           |
| March                                               | 325      | 347      | 0.94       | 0.84–1.04 |
| April                                               | 321      | 344      | 0.93       | 0.84–1.04 |
| May                                                 | 299      | 327      | 0.92       | 0.82–1.03 |
| June                                                | 304      | 310      | 0.98       | 0.88–1.10 |
| July                                                | 344      | 309      | 1.12       | 1.00–1.24 |
| August                                              | 340      | 322      | 1.05       | 0.95–1.17 |
| September                                           | 372      | 338      | 1.10       | 1.00–1.22 |
| October                                             | 374      | 338      | 1.11       | 1.00–1.23 |
| November                                            | 330      | 322      | 1.02       | 0.92–1.14 |
| December                                            | 312      | 306      | 1.02       | 0.91–1.14 |
| <b>Hispanic</b>                                     |          |          |            |           |
| March                                               | 90       | 101      | 0.89       | 0.73–1.10 |
| April                                               | 102      | 101      | 1.01       | 0.83–1.22 |
| May                                                 | 82       | 102      | 0.81       | 0.65–1.00 |
| June                                                | 96       | 103      | 0.93       | 0.76–1.14 |
| July                                                | 97       | 104      | 0.93       | 0.76–1.13 |
| August                                              | 119      | 105      | 1.13       | 0.94–1.35 |
| September                                           | 113      | 105      | 1.08       | 0.90–1.30 |
| October                                             | 109      | 103      | 1.06       | 0.88–1.28 |
| November                                            | 113      | 101      | 1.12       | 0.93–1.34 |
| December                                            | 88       | 101      | 0.87       | 0.71–1.08 |

<sup>a</sup> Observed and expected rates are reported for the COVID-19 period, however expected rates were modeled from the trend in monthly suicide deaths before COVID-19 (January 1, 2015–February 29, 2020).

<sup>b</sup> Non-Hispanic.

**SUPPLEMENTAL TABLE 5** Observed and Expected Monthly Rates During the COVID-19 Period in the United States From March 1, 2020 to December 31, 2020 by Method

|                               | Observed | Expected | Rate Ratio | 95% CI    |
|-------------------------------|----------|----------|------------|-----------|
| <b>Firearms</b>               |          |          |            |           |
| March                         | 265      | 262      | 1.01       | 0.90–1.14 |
| April                         | 254      | 259      | 0.98       | 0.87–1.11 |
| May                           | 250      | 249      | 1.00       | 0.89–1.13 |
| June                          | 273      | 240      | 1.14       | 1.01–1.28 |
| July                          | 308      | 239      | 1.29       | 1.15–1.44 |
| August                        | 285      | 245      | 1.16       | 1.03–1.30 |
| September                     | 323      | 252      | 1.28       | 1.15–1.43 |
| October                       | 330      | 253      | 1.30       | 1.17–1.45 |
| November                      | 274      | 246      | 1.11       | 0.99–1.25 |
| December                      | 281      | 240      | 1.17       | 1.04–1.32 |
| <b>Hanging or suffocation</b> |          |          |            |           |
| March                         | 186      | 198      | 0.94       | 0.81–1.09 |
| April                         | 176      | 201      | 0.88       | 0.76–1.02 |
| May                           | 167      | 198      | 0.84       | 0.73–0.98 |
| June                          | 181      | 192      | 0.94       | 0.81–1.09 |
| July                          | 177      | 190      | 0.93       | 0.80–1.08 |
| August                        | 196      | 195      | 1.00       | 0.87–1.15 |
| September                     | 212      | 203      | 1.05       | 0.91–1.20 |
| October                       | 224      | 205      | 1.10       | 0.96–1.25 |
| November                      | 205      | 197      | 1.04       | 0.91–1.19 |
| December                      | 157      | 186      | 0.84       | 0.72–0.98 |
| <b>Poisoning</b>              |          |          |            |           |
| March                         | 60       | 48       | 1.25       | 0.97–1.62 |
| April                         | 37       | 48       | 0.78       | 0.56–1.07 |
| May                           | 36       | 46       | 0.79       | 0.57–1.09 |
| June                          | 41       | 43       | 0.94       | 0.69–1.28 |
| July                          | 46       | 43       | 1.08       | 0.81–1.44 |
| August                        | 40       | 43       | 0.94       | 0.69–1.28 |
| September                     | 47       | 43       | 1.10       | 0.83–1.46 |
| October                       | 40       | 42       | 0.95       | 0.70–1.30 |
| November                      | 35       | 41       | 0.85       | 0.61–1.18 |
| December                      | 32       | 41       | 0.77       | 0.55–1.09 |
| <b>Other</b>                  |          |          |            |           |
| March                         | 34       | 48       | 0.71       | 0.51–1.00 |
| April                         | 50       | 49       | 1.02       | 0.77–1.34 |
| May                           | 42       | 47       | 0.89       | 0.66–1.21 |
| June                          | 24       | 45       | 0.54       | 0.36–0.80 |
| July                          | 40       | 45       | 0.89       | 0.65–1.21 |
| August                        | 60       | 48       | 1.25       | 0.97–1.61 |
| September                     | 51       | 51       | 1.01       | 0.77–1.33 |
| October                       | 42       | 49       | 0.85       | 0.63–1.15 |
| November                      | 47       | 45       | 1.04       | 0.78–1.38 |
| December                      | 40       | 42       | 0.96       | 0.70–1.31 |

Observed and expected rates are reported for the COVID-19 period, however expected rates were modeled from the trend in monthly suicide deaths before COVID-19 (January 1, 2015–February 29, 2020).
